# Supplementary material for: Advanced atomic layer deposition: metal oxide thin film growth using the discrete feeding method
Source: Royal Society of Chemistry journal article supplement (doi:10.1039/d2tc03485a), 2022-12-12
Supplement: d2tc03485a1.pdf [file d2tc03485a1.pdf]

## Supplementary Information

# Advanced Atomic Layer Deposition: Metal Oxide Thin Film Growth Using the Discrete Feeding Method

Jae Chan Park,<sup>a</sup> Chang Ik Choi,<sup>a</sup> Sang-Gil Lee,<sup>b</sup> Seung Jo Yoo,<sup>b</sup> Ji-Hyun Lee,<sup>b</sup> Jae Hyuck Jang,<sup>b</sup> Woo-Hee Kim,<sup>a</sup> Ji-Hoon Ahn,<sup>a</sup> Jeong Hwan Kim,<sup>\*,c</sup> and Tae Joo Park<sup>\*,a</sup>

<sup>a</sup>Department of Materials Science and Chemical Engineering, Hanyang University, Ansan 15588, Republic of Korea

<sup>b</sup>Center for Research Equipment, Korea Basic Science Institute, Daejeon 34133, Republic of Korea

<sup>c</sup>Department of Advanced Materials Engineering, Hanbat National University, Daejeon 34158, Republic of Korea

\*E-mail: tjp@hanyang.ac.kr; jkim@hanbat.ac.kr

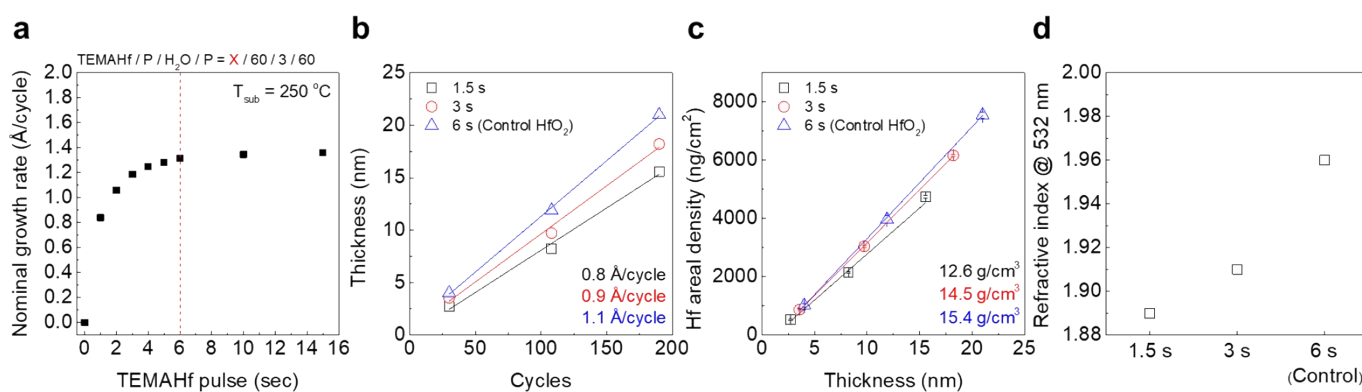

**Fig. S1** (a) Nominal growth rate of the HfO<sub>2</sub> film as a function of the Hf precursor pulse time. Comparison of the (b) growth rate, (b) nominal density, and (c) refractive index of HfO<sub>2</sub> films with various feeding time of precursor.

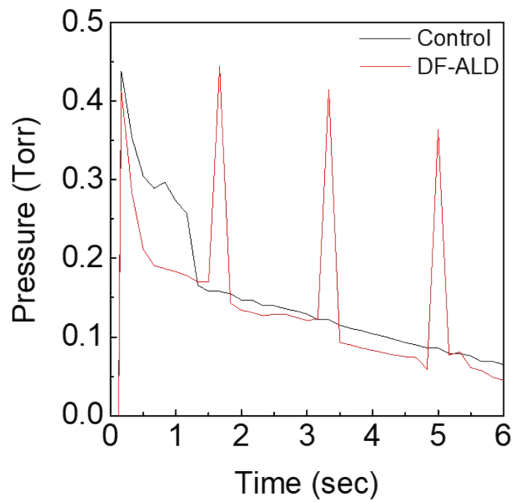

```

integ1
Input
  iy = [Book2]Sheet1!(A"Time",B"Pressure")
Output
  oy = [Book2]Sheet1!(E"Integrated X1",F"Integrated Y1")
(Control) area = 9.20125

```

```

integ1
Input
  iy = [Book2]Sheet1!(C"Time",D"Pressure")
Output
  oy = [Book2]Sheet1!(G"Integrated X2",H"Integrated Y2")
(DF-ALD) area = 9.19692

```

**Fig. S2** Time-dependent pressure variation during the feeding of precursor in the control and DF-ALD processes. The integrated area value shows the exposure amount of the precursor in each process.

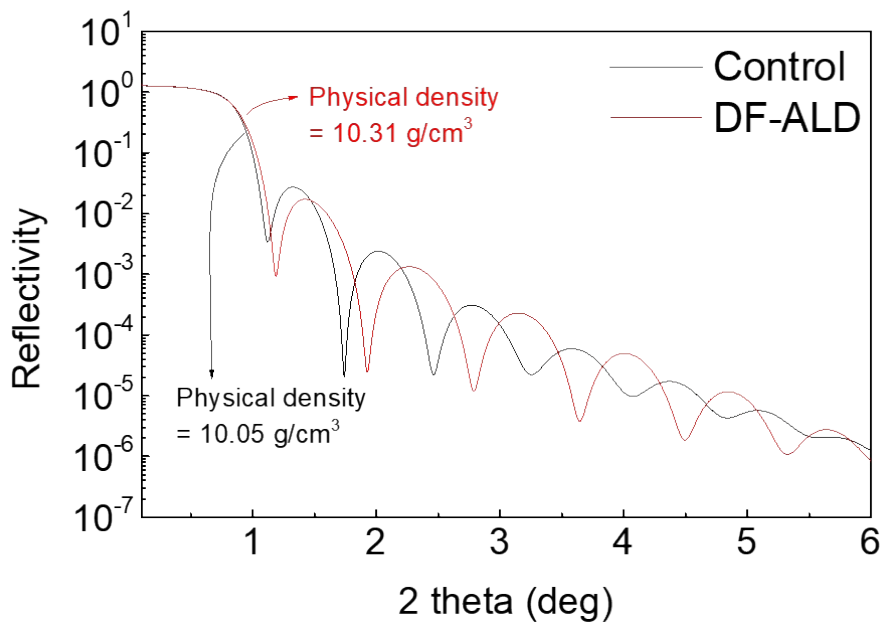

**Fig. S3** XRR results for control and DF-ALD  $\text{HfO}_2$  films with the thickness of  $\sim 10$  nm.

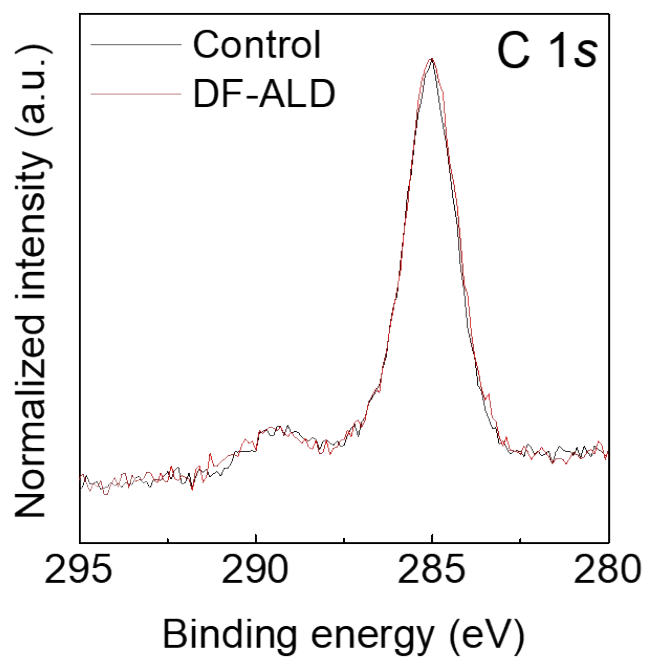

**Fig. S4** C 1s core level XPS spectra of HfO<sub>2</sub> films grown via control and DF-ALD processes.
